# Supplementary material for: Characterization of the mechanism of drug-drug interactions from PubMed using MeSH terms
Source: PubMed Central journal article supplement (PMC5396881; doi:10.1371/journal.pone.0173548), 2017-04-19

ROC for drugs related to DDIs of cyclosporine

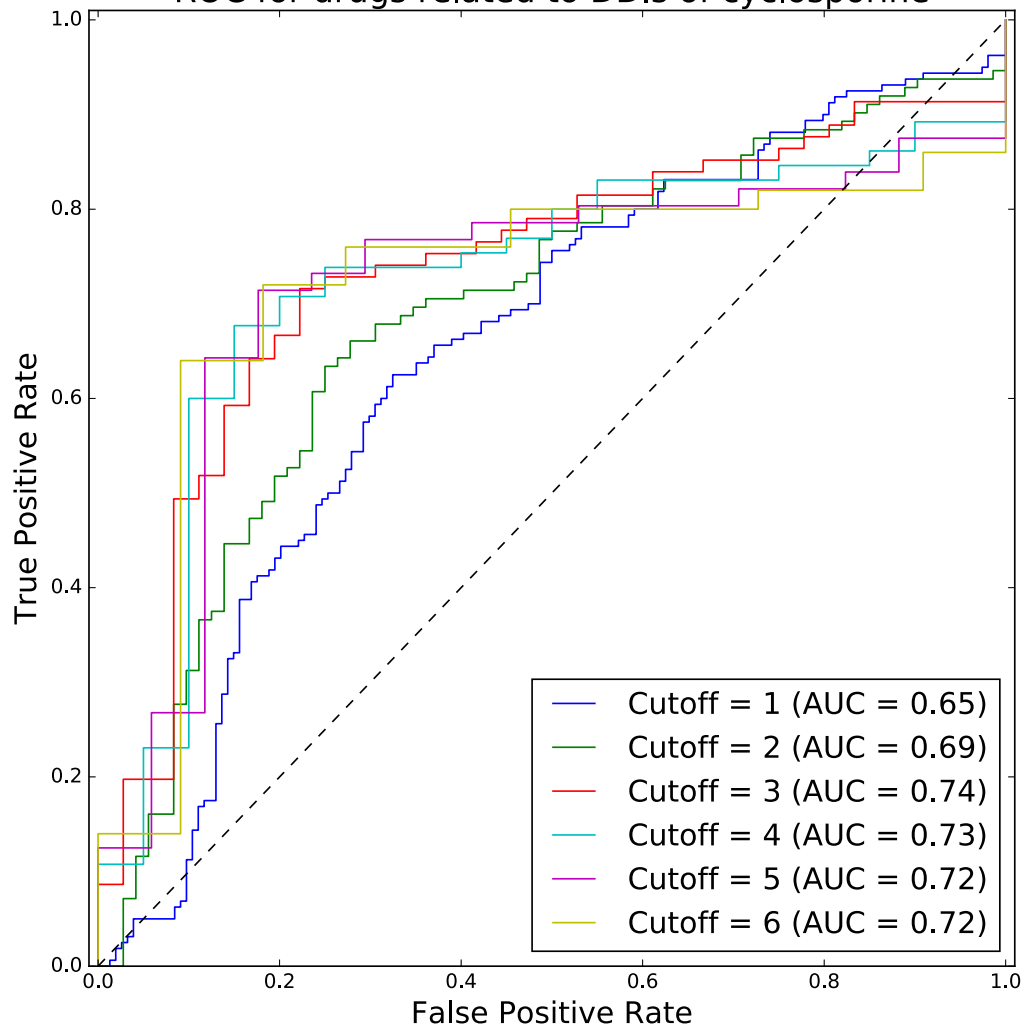

ROC for drugs related to DDIs of rifampin

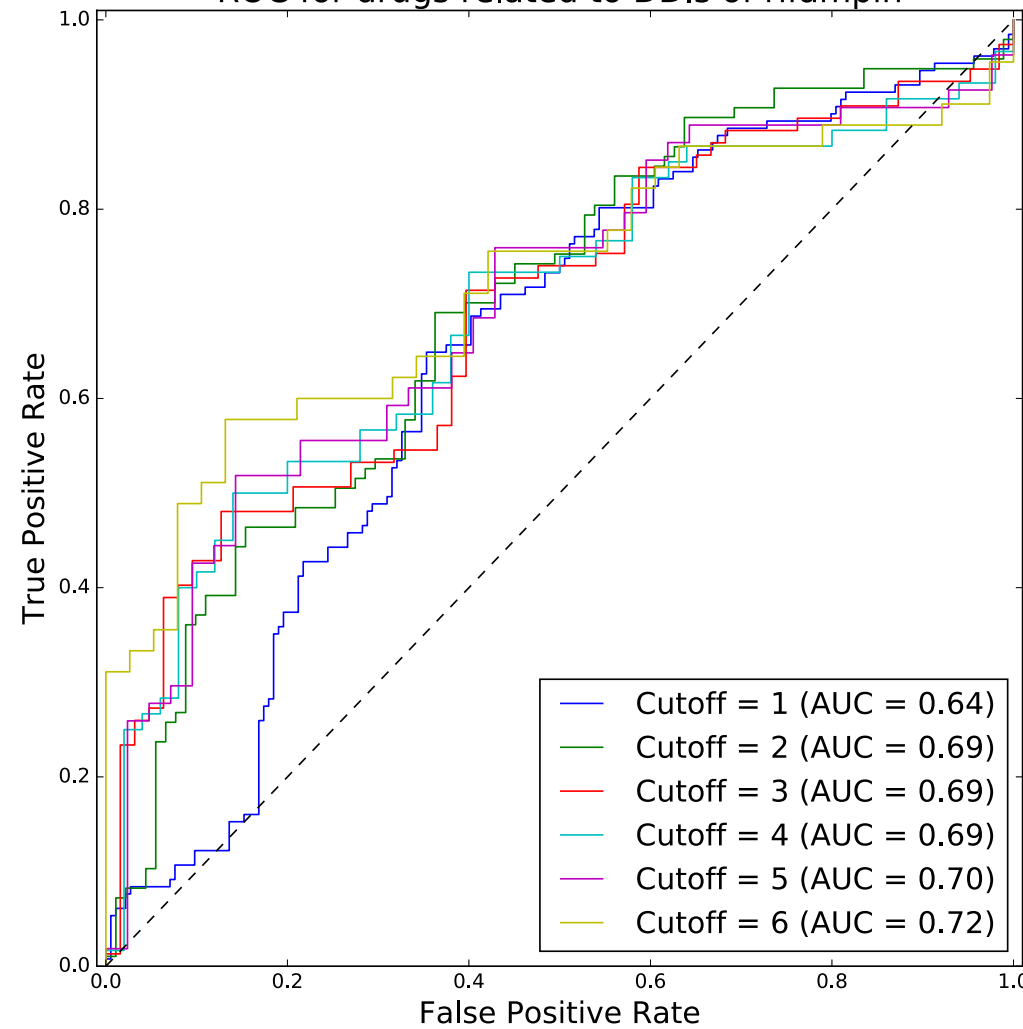

ROC for drugs related to DDIs of theophylline

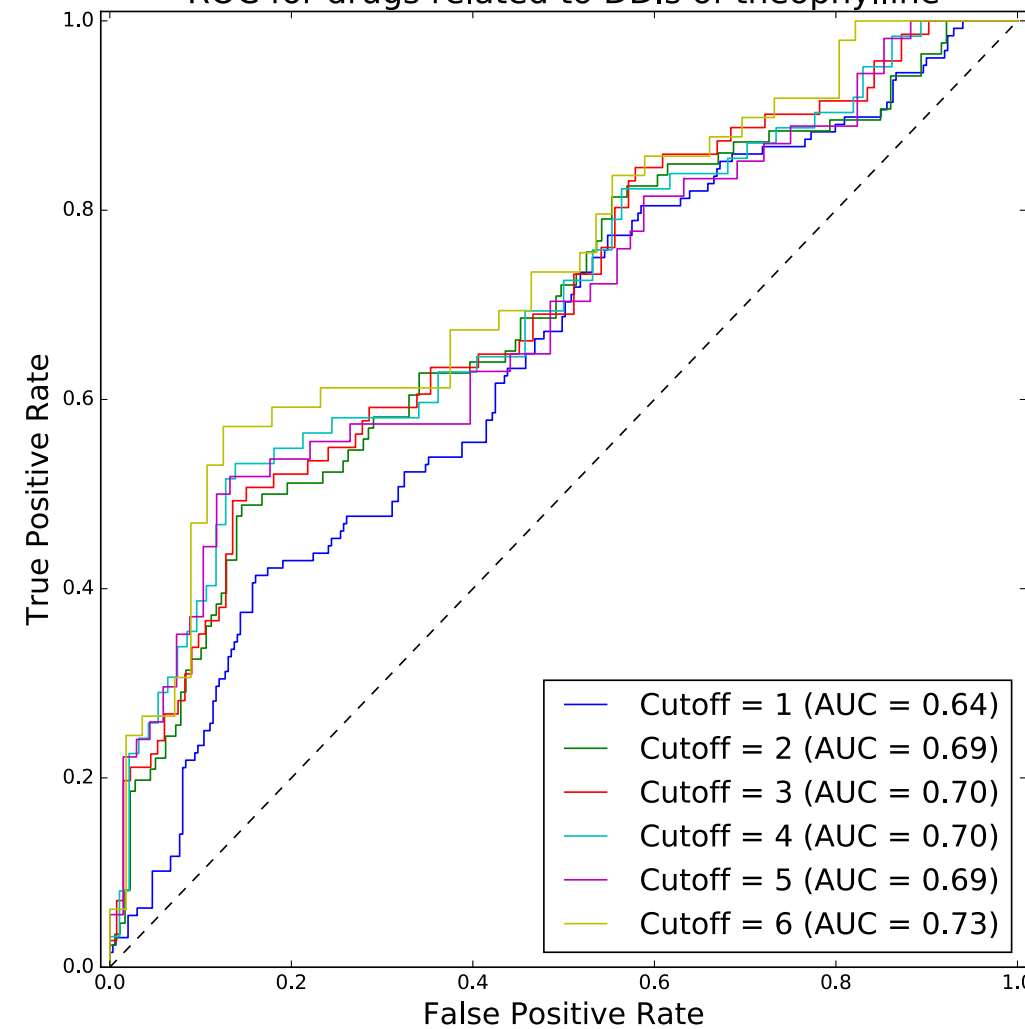

Supplement: pone.0173548.s001.pdf [file pone.0173548.s001.pdf]
