# Supplementary material for: Characterization of the mechanism of drug-drug interactions from PubMed using MeSH terms
Source: PubMed Central journal article supplement (PMC5396881; doi:10.1371/journal.pone.0173548), 2017-04-19
Supplement: pone.0173548.s002.pdf [file pone.0173548.s002.pdf]

**S1 Table. Significant DDI-related drug terms for cyclosporine, rifampin and theophylline.** The gold standard in the manuscript is known DDI pairs from four databases including LexiComp, Clinical Pharmacology, Drug Interaction Checker, and Micromedex. “Actual result” indicates whether the identified drug term is true (1) or false (0).

### Cyclosporine

| Drug Name      | p value  | Micromedex      | Lexicomp                      | Clinical Pharmacology | Drug Checker | Actual result |
|----------------|----------|-----------------|-------------------------------|-----------------------|--------------|---------------|
| Voriconazole   | 0        | Major           | Null                          | Level 2(Major)        | Major        | 1             |
| Rifampin       | 0        | Major           | Null                          | Level 2(Major)        | Major        | 1             |
| Fluconazole    | 0        | Major           | Null                          | Level 2(Major)        | Moderate     | 1             |
| Itraconazole   | 0        | Major           | Null                          | Level 2(Major)        | Major        | 1             |
| Ketoconazole   | 0        | Moderate        | Consider therapy modification | Level 2(Major)        | Major        | 1             |
| Simvastatin    | 0        | Contraindicated | Null                          | Level 1(Severe)       | Major        | 1             |
| Warfarin       | 0        | Moderate        | Null                          | Level 3(Moderate)     | Moderate     | 1             |
| Estrone        | 0        | Null            | Null                          | Null                  | Null         | 0             |
| Gemfibrozil    | 0        | Null            | Null                          | Null                  | Moderate     | 1             |
| Digoxin        | 0        | Moderate        | Null                          | Level 2(Major)        | Moderate     | 1             |
| Clarithromycin | 0        | Moderate        | Null                          | Level 2(Major)        | Major        | 1             |
| Probucol       | 0        | Moderate        | Null                          | Level 3(Moderate)     | Moderate     | 1             |
| Pravastatin    | 0        | Major           | Null                          | Null                  | Moderate     | 1             |
| Erythromycin   | 0        | Moderate        | Monitor therapy               | Level 2(Major)        | Major        | 1             |
| Cimetidine     | 0        | Moderate        | Null                          | Level 3(Moderate)     | Minor        | 1             |
| Doxorubicin    | 0        | Major           | Consider therapy modification | Level 2(Major)        | Moderate     | 1             |
| Verapamil      | 0        | Moderate        | Null                          | Level 3(Moderate)     | Moderate     | 1             |
| Midazolam      | 0        | Moderate        | Null                          | Null                  | Null         | 1             |
| Diltiazem      | 0        | Moderate        | Null                          | Level 3(Moderate)     | Moderate     | 1             |
| Felodipine     | 0        | Major           | Null                          | Level 2(Major)        | Moderate     | 1             |
| Nifedipine     | 1.22E-15 | Null            | Null                          | Level 3(Moderate)     | Moderate     | 1             |
| Chloroquine    | 2.57E-13 | Moderate        | Null                          | Null                  | Moderate     | 1             |
| Amphotericin B | 7.02E-13 | Moderate        | Monitor therapy               | Level 3(Moderate)     | Moderate     | 1             |
| Sirolimus      | 1.36E-12 | Moderate        | Null                          | Level 2(Major)        | Moderate     | 1             |
| Vincristine    | 1.62E-11 | Major           | Avoid combination             | Null                  | Moderate     | 1             |
| Probenecid     | 5.64E-11 | Null            | Null                          | Null                  | Major        | 1             |
| Paclitaxel     | 1.61E-10 | Null            | Monitor therapy               | Level 2(Major)        | Moderate     | 1             |
| Diclofenac     | 1.94E-10 | Major           | Consider therapy modification | Level 2(Major)        | Moderate     | 1             |
| Vinblastine    | 6.95E-10 | Null            | Null                          | Null                  | Minor        | 1             |
| Lovastatin     | 1.11E-08 | Major           | Null                          | Null                  | Major        | 1             |
| Colchicine     | 4.55E-08 | Contraindicated | Null                          | Level 2(Major)        | Major        | 1             |

|               |             |          |                 |                   |          |   |
|---------------|-------------|----------|-----------------|-------------------|----------|---|
| Amiodarone    | 6.59E-08    | Moderate | Null            | Level 3(Moderate) | Moderate | 1 |
| Daunorubicin  | 2.75E-07    | Null     | Monitor therapy | Level 2(Major)    | Moderate | 1 |
| Tamoxifen     | 5.12E-07    | Null     | Null            | Null              | Null     | 0 |
| Estradiol     | 2.06E-06    | Null     | Monitor therapy | Null              | Moderate | 1 |
| Losartan      | 3.27E-05    | Null     | Null            | Null              | Moderate | 1 |
| Indomethacin  | 0.000119002 | Major    | Null            | Null              | Moderate | 1 |
| Vitamin E     | 0.000243027 | Null     | Monitor therapy | Null              | Minor    | 1 |
| Calcitriol    | 0.000560794 | Null     | Null            | Null              | Null     | 0 |
| Etoposide     | 0.000718607 | Major    | Null            | Null              | Moderate | 1 |
| Cisplatin     | 0.002769689 | Null     | Null            | Level 3(Moderate) | Null     | 1 |
| Glycerol      | 0.004404986 | Null     | Null            | Null              | Null     | 0 |
| Acetylcholine | 0.008687497 | Null     | Null            | Null              | Null     | 0 |
| Thalidomide   | 0.0144237   | Moderate | Null            | Null              | Null     | 1 |
| Phenytoin     | 0.063315229 | Moderate | Null            | Level 3(Moderate) | Moderate | 1 |
| Potassium     | 0.077725096 | Null     | Null            | Null              | Null     | 0 |

## Rifampin

| Drug name      | p value | Micromedex      | Lexicomp                      | Clinical Pharmacology | Drug Checker | Actual result |
|----------------|---------|-----------------|-------------------------------|-----------------------|--------------|---------------|
| Nelfinavir     | 0       | Contraindicated | Null                          | Null                  | Major        | 1             |
| Ketoconazole   | 0       | Major           | Consider therapy modification | Level 2(Major)        | Moderate     | 1             |
| Simvastatin    | 0       | Moderate        | Null                          | Null                  | Major        | 1             |
| Warfarin       | 0       | Moderate        | Null                          | Level 2(Major)        | Major        | 1             |
| Digoxin        | 0       | Moderate        | Null                          | Level 3(Moderate)     | Moderate     | 1             |
| Tacrolimus     | 0       | Major           | Consider therapy modification | Level 2(Major)        | Major        | 1             |
| Cyclosporine   | 0       | Major           | Consider therapy modification | Level 2(Major)        | Major        | 1             |
| Methadone      | 0       | Moderate        | Null                          | Level 2(Major)        | Moderate     | 1             |
| Phenytoin      | 0       | Major           | Null                          | Level 2(Major)        | Moderate     | 1             |
| Digitoxin      | 0       | Moderate        | Null                          | Null                  | Moderate     | 1             |
| Itraconazole   | 0       | Major           | Null                          | Level 2(Major)        | Moderate     | 1             |
| Ritonavir      | 0       | Major           | Null                          | Null                  | Major        | 1             |
| Verapamil      | 0       | Moderate        | Consider therapy modification | Null                  | Moderate     | 1             |
| Glyburide      | 0       | Moderate        | Null                          | Null                  | Moderate     | 1             |
| Amphotericin B | 0       | Null            | Null                          | Null                  | Null         | 0             |
| Midazolam      | 0       | Moderate        | Null                          | Level 2(Major)        | Minor        | 1             |
| Colistin       | 0       | Null            | Null                          | Null                  | Null         | 0             |
| Fluconazole    | 0       | Moderate        | Null                          | Level 2(Major)        | Moderate     | 1             |
| Cimetidine     | 0       | Null            | Null                          | Null                  | Null         | 0             |
| Ethanol        | 0       | Null            | Null                          | Level 2(Major)        | Null         | 1             |
| Lopinavir      | 0       | Contraindicated | Null                          | Null                  | Null         | 1             |

|                   |             |          |                   |                   |          |   |
|-------------------|-------------|----------|-------------------|-------------------|----------|---|
| Nifedipine        | 0           | Major    | Avoid combination | Level 1(Severe)   | Moderate | 1 |
| Carbamazepine     | 0           | Moderate | Null              | Level 2(Major)    | Moderate | 1 |
| Nevirapine        | 0           | Major    | Consider therapy  | Level 1(Severe)   | Major    | 1 |
|                   |             |          | modification      |                   |          |   |
| Quinidine         | 0           | Moderate | Null              | Level 2(Major)    | Moderate | 1 |
| Imipenem          | 0           | Null     | Null              | Null              | Null     | 0 |
| Theophylline      | 0           | Moderate | Null              | Null              | Moderate | 1 |
| Fosfomycin        | 0           | Null     | Null              | Null              | Null     | 0 |
| Zidovudine        | 0           | Moderate | Null              | Null              | Moderate | 1 |
| Tolbutamide       | 0           | Moderate | Null              | Null              | Moderate | 1 |
| Phenobarbital     | 9.99E-16    | Null     | Null              | Level 2(Major)    | Moderate | 1 |
| Rifabutin         | 1.20E-12    | Null     | Null              | Null              | Null     | 0 |
| Ceftazidime       | 1.28E-12    | Null     | Null              | Null              | Null     | 0 |
| Pefloxacin        | 5.44E-12    | Null     | Null              | Null              | Null     | 0 |
| Prednisolone      | 3.63E-11    | Moderate | Monitor therapy   | Null              | Moderate | 1 |
| Polymyxin B       | 9.41E-11    | Null     | Null              | Null              | Null     | 0 |
| Gentamicins       | 3.75E-10    | Null     | Null              | Null              | Null     | 0 |
| Phenylbutazone    | 6.29E-10    | Null     | Null              | Null              | Null     | 0 |
| Novobiocin        | 1.45E-09    | Null     | Null              | Null              | Null     | 0 |
| Ethinyl Estradiol | 2.70E-09    | Moderate | Null              | Null              | Major    | 1 |
| Vancomycin        | 4.63E-09    | Null     | Null              | Null              | Null     | 0 |
| Hydrocortisone    | 1.38E-07    | Moderate | Monitor therapy   | Null              | Moderate | 1 |
| Oxacillin         | 1.41E-06    | Null     | Null              | Null              | Null     | 0 |
| Flucytosine       | 4.91E-06    | Null     | Null              | Null              | Null     | 0 |
| Trimethoprim      | 1.15E-05    | Null     | Null              | Level 3(Moderate) | Moderate | 1 |
| Acetaminophen     | 7.83E-05    | Null     | Null              | Level 3(Moderate) | Minor    | 1 |
| Clarithromycin    | 0.000132095 | Moderate | Null              | Level 2(Major)    | Moderate | 1 |
| Antipyrine        | 0.000149341 | Null     | Null              | Null              | Null     | 0 |
| Ciprofloxacin     | 0.000181653 | Null     | Monitor therapy   | Null              | Null     | 1 |
| Testosterone      | 0.000660474 | Null     | Null              | Null              | Moderate | 1 |
| Methicillin       | 0.001190581 | Null     | Null              | Null              | Null     | 0 |
| Clindamycin       | 0.001536213 | Null     | Null              | Null              | Null     | 0 |
| Fusidic Acid      | 0.00160905  | Null     | Null              | Null              | Null     | 0 |
| Bacitracin        | 0.001947541 | Null     | Null              | Null              | Null     | 0 |
| Amikacin          | 0.002012159 | Null     | Null              | Null              | Null     | 0 |
| Erythromycin      | 0.002900355 | Null     | Consider therapy  | Level 2(Major)    | Moderate | 1 |
|                   |             |          | modification      |                   |          |   |
| Tobramycin        | 0.012559574 | Null     | Null              | Null              | Null     | 0 |
| Sulfamethoxazole  | 0.035978179 | Null     | Null              | Level 3(Moderate) | Moderate | 1 |
| Dexamethasone     | 0.050438031 | Moderate | Consider therapy  | Null              | Moderate | 1 |
|                   |             |          | modification      |                   |          |   |
| Glutathione       | 0.056053813 | Null     | Null              | Null              | Null     | 0 |
| Tetracycline      | 0.090097233 | Null     | Null              | Null              | Moderate | 1 |

## Theophylline

| Drug Name      | p value  | Micromedex | Lexicomp                      | Clinical Pharmacology | Drug Checker | Actual result |
|----------------|----------|------------|-------------------------------|-----------------------|--------------|---------------|
| Ciprofloxacin  | 0        | Major      | Consider therapy modification | Level 2(Major)        | Major        | 1             |
| Cimetidine     | 0        | Major      | Null                          | Level 2(Major)        | Moderate     | 1             |
| Erythromycin   | 0        | Major      | Consider therapy modification | Level 2(Major)        | Moderate     | 1             |
| Warfarin       | 0        | Null       | Null                          | Null                  | Null         | 0             |
| Fluvoxamine    | 0        | Major      | Null                          | Level 2(Major)        | Major        | 1             |
| Clarithromycin | 0        | Minor      | Null                          | Level 2(Major)        | Moderate     | 1             |
| Ofloxacin      | 0        | Minor      | Consider therapy modification | Null                  | Moderate     | 1             |
| Ranitidine     | 0        | Minor      | Null                          | Level 3(Moderate)     | Moderate     | 1             |
| Enoxacin       | 0        | Major      | Null                          | Null                  | Major        | 1             |
| Norfloxacin    | 0        | Moderate   | Null                          | Null                  | Moderate     | 1             |
| Omeprazole     | 0        | Null       | Null                          | Null                  | Moderate     | 1             |
| Mexiletine     | 0        | Major      | Null                          | Level 3(Moderate)     | Moderate     | 1             |
| Lansoprazole   | 0        | Minor      | Null                          | Level 4(Minor)        | Moderate     | 1             |
| Terfenadine    | 0        | Null       | Null                          | Null                  | Null         | 0             |
| Midazolam      | 0        | Moderate   | Null                          | Null                  | Minor        | 1             |
| Pimozide       | 0        | Null       | Null                          | Null                  | Null         | 0             |
| Apomorphine    | 1.11E-16 | Null       | Null                          | Null                  | Null         | 0             |
| Troleandomycin | 1.11E-16 | Major      | Null                          | Level 2(Major)        | Moderate     | 1             |
| Isoniazid      | 3.33E-16 | Minor      | Null                          | Null                  | Moderate     | 1             |
| Norepinephrine | 2.22E-15 | Null       | Null                          | Null                  | Null         | 0             |
| Rifampin       | 8.25E-14 | Moderate   | Null                          | Level 2(Major)        | Moderate     | 1             |
| Carbamazepine  | 2.34E-13 | Moderate   | Null                          | Level 2(Major)        | Moderate     | 1             |
| Isoproterenol  | 3.22E-12 | Moderate   | Null                          | Null                  | Moderate     | 1             |
| Epinephrine    | 1.20E-10 | Null       | Monitor therapy               | Null                  | Null         | 1             |
| Lithium        | 5.85E-10 | Moderate   | Null                          | Level 2(Major)        | Moderate     | 1             |
| Propranolol    | 8.61E-10 | Moderate   | Null                          | Null                  | Major        | 1             |
| Nifedipine     | 8.96E-10 | Minor      | Null                          | Null                  | Minor        | 1             |
| Phenytoin      | 1.05E-09 | Major      | Null                          | Level 3(Moderate)     | Moderate     | 1             |
| Histamine      | 4.19E-09 | Null       | Null                          | Null                  | Null         | 0             |
| Ketoconazole   | 6.71E-09 | Null       | Consider therapy modification | Level 4(Minor)        | Minor        | 1             |
| Allopurinol    | 8.57E-09 | Moderate   | Null                          | Level 4(Minor)        | Minor        | 1             |
| Ergotamine     | 1.23E-08 | Null       | Null                          | Null                  | Moderate     | 1             |
| Reserpine      | 7.21E-08 | Null       | Null                          | Null                  | Null         | 0             |
| Diltiazem      | 1.57E-07 | Moderate   | Null                          | Level 3(Moderate)     | Moderate     | 1             |
| Terbutaline    | 1.03E-05 | Minor      | Null                          | Null                  | Moderate     | 1             |
| Hydroxyurea    | 1.21E-05 | Null       | Null                          | Null                  | Null         | 0             |
| Haloperidol    | 1.61E-05 | Null       | Null                          | Null                  | Null         | 0             |

|                    |             |          |                 |                   |          |   |
|--------------------|-------------|----------|-----------------|-------------------|----------|---|
| Glycerol           | 2.41E-05    | Null     | Null            | Null              | Null     | 0 |
| Pentoxifylline     | 4.02E-05    | Moderate | Null            | Null              | Moderate | 1 |
| Morphine           | 0.000101897 | Null     | Null            | Null              | Null     | 0 |
| Nicotine           | 0.000116199 | Null     | Null            | Null              | Null     | 0 |
| Antipyrine         | 0.000123078 | Null     | Null            | Null              | Null     | 0 |
| Diazepam           | 0.000142808 | Moderate | Null            | Null              | Minor    | 1 |
| Clonidine          | 0.000218889 | Null     | Null            | Null              | Null     | 0 |
| Phenoxybenzamine   | 0.000222873 | Null     | Null            | Null              | Null     | 0 |
| Aspirin            | 0.00024491  | Null     | Null            | Null              | Null     | 0 |
| Lysine             | 0.000362401 | Null     | Null            | Null              | Null     | 0 |
| Phentolamine       | 0.000503951 | Null     | Null            | Null              | Null     | 0 |
| Cholecystokinin    | 0.000571972 | Null     | Null            | Null              | Null     | 0 |
| Tetracycline       | 0.000623148 | Null     | Null            | Null              | Null     | 0 |
| Phenacetin         | 0.000806017 | Null     | Null            | Null              | Null     | 0 |
| Dipyridamole       | 0.000918772 | Null     | Null            | Null              | Moderate | 1 |
| Phenylephrine      | 0.001167878 | Null     | Monitor therapy | Null              | Moderate | 1 |
| Halothane          | 0.001232781 | Major    | Null            | Null              | Major    | 1 |
| Ethanol            | 0.002312524 | Null     | Null            | Null              | Null     | 0 |
| Epoprostenol       | 0.003745631 | Null     | Null            | Null              | Null     | 0 |
| Digoxin            | 0.003956863 | Null     | Null            | Null              | Null     | 0 |
| Verapamil          | 0.004940374 | Moderate | Null            | Level 3(Moderate) | Moderate | 1 |
| Alanine            | 0.005125899 | Null     | Null            | Null              | Null     | 0 |
| Acetylcholine      | 0.005204899 | Null     | Null            | Null              | Null     | 0 |
| Lidocaine          | 0.006622202 | Null     | Null            | Null              | Moderate | 1 |
| Caffeine           | 0.007648404 | Null     | Null            | Level 2(Major)    | Moderate | 1 |
| Arginine           | 0.010821092 | Null     | Null            | Null              | Null     | 0 |
| Papaverine         | 0.015567569 | Null     | Null            | Null              | Null     | 0 |
| Nitroprusside      | 0.01814649  | Null     | Null            | Null              | Null     | 0 |
| Prednisolone       | 0.023412626 | Null     | Null            | Null              | Moderate | 1 |
| Fenoterol          | 0.028820318 | Null     | Null            | Null              | Null     | 0 |
| Methylprednisolone | 0.035004248 | Null     | Null            | Null              | Moderate | 1 |
| Dexamethasone      | 0.042006899 | Null     | Monitor therapy | Null              | Moderate | 1 |
| Atropine           | 0.042072221 | Null     | Null            | Null              | Null     | 0 |
| Adenosine          | 0.075564767 | Major    | Null            | Level 2(Major)    | Moderate | 1 |
| Estradiol          | 0.077674371 | Null     | Monitor therapy | Null              | Moderate | 1 |
| Carbachol          | 0.098154922 | Null     | Null            | Null              | Null     | 0 |
