# Supplementary material for: Characterization of the mechanism of drug-drug interactions from PubMed using MeSH terms
Source: PubMed Central journal article supplement (PMC5396881; doi:10.1371/journal.pone.0173548), 2017-04-19
Supplement: pone.0173548.s003.pdf [file pone.0173548.s003.pdf]

**S2 Table. Significant DDI-related proteins for cyclosporine, rifampin and theophylline.** DDI-related proteins were manually validated from literatures. “Actual result” indicates whether the identified protein term is true (1) or false (0).

### Cyclosporine

|  | Protein name                                   | p value     | Actual result |
|--|------------------------------------------------|-------------|---------------|
|  | Organic Anion Transporters                     | 0           | 1             |
|  | Cytochrome P-450 CYP3A                         | 0           | 1             |
|  | P-Glycoprotein                                 | 0           | 1             |
|  | Cytochrome P-450 Enzyme System                 | 0           | 1             |
|  | Mixed Function Oxygenases                      | 0           | 0             |
|  | Organic Anion Transporters, Sodium-Independent | 0           | 1             |
|  | Aryl Hydrocarbon Hydroxylases                  | 0           | 0             |
|  | Oxidoreductases, N-Demethylating               | 7.18E-14    | 0             |
|  | ATP-Binding Cassette Transporters              | 1.68E-09    | 1             |
|  | Multidrug Resistance-Associated Proteins       | 1.88E-08    | 1             |
|  | Membrane Transport Proteins                    | 6.75E-08    | 1             |
|  | Creatine Kinase                                | 3.33E-07    | 1             |
|  | Immunotoxins                                   | 8.54E-07    | 0             |
|  | Adenosine Triphosphatases                      | 7.17E-06    | 0             |
|  | Phytohemagglutinins                            | 8.36E-05    | 1             |
|  | Neoplasm Proteins                              | 0.000242148 | 1             |
|  | P-Glycoproteins                                | 0.000268303 | 1             |
|  | Potassium Channels                             | 0.002236825 | 0             |
|  | L-Lactate Dehydrogenase                        | 0.00950413  | 0             |
|  | TOR Serine-Threonine Kinases                   | 0.03366479  | 0             |
|  | Cholesterol, LDL                               | 0.057253658 | 0             |
|  | Receptors, Interleukin-2                       | 0.060776758 | 0             |

### Rifampin

|  | Protein name                   | p value  | Actual result |
|--|--------------------------------|----------|---------------|
|  | Cytochrome P-450 CYP3A         | 0        | 1             |
|  | Cytochrome P-450 CYP2C8        | 0        | 1             |
|  | Organic Anion Transporters     | 0        | 1             |
|  | Cytochrome P-450 Enzyme System | 0        | 1             |
|  | P-Glycoprotein                 | 0        | 1             |
|  | Cytochrome P-450 CYP2D6        | 0        | 0             |
|  | Cytochrome P-450 CYP2C9        | 2.78E-15 | 1             |
|  | beta-Lactamases                | 1.99E-14 | 1             |
|  | P-Glycoproteins                | 4.45E-14 | 1             |
|  | Aryl Hydrocarbon Hydroxylases  | 5.53E-14 | 0             |

|                                                |             |   |
|------------------------------------------------|-------------|---|
| Organic Anion Transporters, Sodium-Independent | 1.45E-13    | 1 |
| Cytochrome P-450 CYP2B6                        | 2.77E-11    | 1 |
| Oxidoreductases, N-Demethylating               | 2.83E-05    | 0 |
| Coagulase                                      | 0.000269775 | 0 |
| Mixed Function Oxygenases                      | 0.000325094 | 0 |
| Glucuronosyltransferase                        | 0.000384339 | 1 |
| Blood Proteins                                 | 0.010634945 | 0 |
| ATP-Binding Cassette Transporters              | 0.014110964 | 1 |
| Alanine Transaminase                           | 0.069149019 | 0 |

## Theophylline

|  | Protein name                    | p value     | Actual result |
|--|---------------------------------|-------------|---------------|
|  | Cytochrome P-450 CYP1A2         | 5.77E-15    | 1             |
|  | Phosphorylases                  | 1.40E-12    | 1             |
|  | Glucosyltransferases            | 2.13E-10    | 0             |
|  | Cytochrome P-450 Enzyme System  | 1.34E-07    | 1             |
|  | Receptors, Cholinergic          | 2.61E-07    | 0             |
|  | Cytochrome P-450 CYP3A          | 1.64E-05    | 1             |
|  | Phosphoric Monoester Hydrolases | 0.000260075 | 0             |
|  | Mixed Function Oxygenases       | 0.000309117 | 1             |
|  | Receptors, Drug                 | 0.000982719 | 0             |
|  | Pyridoxal Phosphate             | 0.009505123 | 0             |
|  | Nerve Tissue Proteins           | 0.027571582 | 0             |
|  | Receptors, Adrenergic           | 0.038638602 | 1             |
